# Supplementary material for: The Immediate Effect of Sildenafil on Right Ventricular Function in Patients with Heart Failure Measured by Cardiac Magnetic Resonance: A Randomized Control Trial
Source: PLoS One. 2015 Mar 20;10(3):e0119623. doi: 10.1371/journal.pone.0119623 (PMC4368670; doi:10.1371/journal.pone.0119623)
Supplement: S1 IRB Approval — (PDF) [file pone.0119623.s005.pdf]

**PARECER CONSUBSTANCIADO DO CEP**

**DADOS DO PROJETO DE PESQUISA**

**Título da Pesquisa:** Impacto do sildenafil na função ventricular direita de pacientes com insuficiência cardíaca

**Pesquisador:** Andre Maurício Souza Fernandes

**Área Temática:** Área 3. Fármacos, medicamentos, vacinas e testes diagnósticos novos (fases I, II e III) ou não registrados no país (ainda que fase IV), ou quando a pesquisa for referente a seu uso com modalidades, indicações, doses ou vias de administração diferentes daquelas estabelecidas, incluindo seu emprego em combinações.

**Versão:** 1

**CAAE:** 05378712.0.0000.0045

**Instituição Proponente:** Hospital Ana Nery - HAN/SESAB

**DADOS DO PARECER**

**Número do Parecer:** 118.327-2

**Data da Relatoria:** 27/09/2012

**Apresentação do Projeto:**

O referido projeto de pesquisa tem como objeto de estudo os pacientes com Insuficiência Cardíaca e que apresentem simultaneamente Hipertensão Pulmonar. Os pacientes do estudo serão submetidos a um medivamento que sabidamente diminui os níveis pressóricos da circulação pulmonar, melhorando assim a função ventricular direita. Este contexto de evolução aguda será avaliado através do método de imagem - Ressonância Nuclear Magnética após a dose de 50mg de Sildenafil.

**Objetivo da Pesquisa:**

Avaliar a função cardíaca direita de pacientes portadores de Insuficiência Cardíaca que possuam Hipertensão pulmonar através da Ressonância Nuclear Magnética.

**Avaliação dos Riscos e Benefícios:**

Os riscos de ts pesquisa são mínimos, uma vez que o sildenafil já é um tratamento consolidado na literatura mundial para os pacientes com quadro de Hipertensão Pulmonar. Já em relação a tçwecnica de imagem, os pacientes que porventura apresentem algum grau de claustrofobia podem evoluir com discreto desconforto.

**Comentários e Considerações sobre a Pesquisa:**

Este projeto trará dados importantes na análise da função cardíaca direita de pacientes com iC e

**Endereço:** Rua Saldanha Marinho, s/nº

**Bairro:** Caixa D Água

**CEP:** 40.323-010

**UF:** BA

**Município:** SALVADOR

**Telefone:** (71)3342-2505

**Fax:** (71)3117-1972

**E-mail:** armenio@terra.com.br

HOSPITAL ANA NERY -  
HAN/SESAB

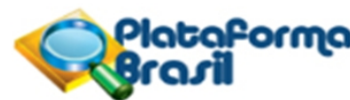

que tenham HAP. Não foi encontrado em nenhum passo da realização do projeto de pesquisa nenhum passo que venha a ferir os princípios éticos exigidos pelo CEP.

**Considerações sobre os Termos de apresentação obrigatória:**

O TCLE se apresenta de forma clara, objetiva e de fácil entendimento para a aplicação durante o trabalho.

**Recomendações:**

**Conclusões ou Pendências e Lista de Inadequações:**

O projeto de pesquisa não apresenta nenhuma pendência para sua realização.

**Situação do Parecer:**

Aprovado

**Necessita Apreciação da CONEP:**

Não

**Considerações Finais a critério do CEP:**

SALVADOR, 09 de Outubro de 2012

---

**Assinador por:**

**Erenaldo de Souza Rodrigues Junior  
(Coordenador)**

**Este parecer reemitido substitui o parecer número 118327-1 gerado na data 10/10/2012 01:08:35.**

**Endereço:** Rua Saldanha Marinho, s/nº

**Bairro:** Caixa D Água

**CEP:** 40.323-010

**UF:** BA

**Município:** SALVADOR

**Telefone:** (71)3342-2505

**Fax:** (71)3117-1972

**E-mail:** armenio@terra.com.br
